# Supplementary material
Source: HighWire-hosted journal article supplement (http://www.jrheum.org/highwire/filestream/30205/field_highwire_adjunct_files/0/160792DataSuppl.pdf)
Supplement: 160792DataSuppl.pdf [file 160792DataSuppl.pdf]

**Supplementary Table 1.** Classification of Causes of Deaths According to *International Classification of Diseases*, 10<sup>th</sup> version.

| Classification          | ICD-10                          | Diagnosis                                                           |
|-------------------------|---------------------------------|---------------------------------------------------------------------|
| Cardiovascular diseases | I11                             | Hypertensive heart disease                                          |
|                         | I20                             | Angina pectoris                                                     |
|                         | I21                             | Acute myocardial infarction                                         |
|                         | I22                             | Subsequent myocardial infarction                                    |
|                         | I23                             | Certain current complications following acute myocardial infarction |
|                         | I24                             | other acute ischemic heart disease                                  |
|                         | I25                             | chronic ischemic heart disease                                      |
|                         | I26                             | pulmonary embolism                                                  |
|                         | I42                             | cardiomyopathy                                                      |
|                         | I51                             | complications and ill-defined descriptions of heart disease         |
|                         | I60                             | Subarachnoid hemorrhage                                             |
|                         | I61                             | Intracerebral hemorrhage                                            |
|                         | I62                             | Other nontraumatic intracranial hemorrhage                          |
|                         | I63                             | Cerebral infarction                                                 |
|                         | I64                             | Stroke, not specified as hemorrhage or infarction                   |
|                         | I67                             | Other cerebrovascular diseases                                      |
|                         | I69                             | Sequelae of cerebrovascular disease                                 |
|                         | I70                             | Atherosclerosis                                                     |
|                         | I71                             | Aortic aneurysm and dissection                                      |
|                         | I72                             | Other aneurysm                                                      |
| K55                     | Vascular disorders of intestine |                                                                     |
| R55                     | Syncope and collapse            |                                                                     |
| R57                     | Cardiogenic shock               |                                                                     |
| Malignancy              | C00-D48                         | Neoplasms                                                           |
|                         | E85                             | Amyloidosis                                                         |

**Supplementary Table 2.** Baseline characteristics according to 4 groups of serum uric acid level in all participants.

|                                           | All           | Serum uric acid (mg/dL) |              |              |             | P      |
|-------------------------------------------|---------------|-------------------------|--------------|--------------|-------------|--------|
|                                           |               | ≤ 4.0                   | 4.1 ~ 6.0    | 6.1~8.0      | > 8.0       |        |
| <b>N (%)</b>                              | 27489         | 6728 (24.5)             | 14855 (54.0) | 5379 (19.6)  | 527 (1.9)   |        |
| <b>Age (years)</b>                        | 56.4 ± 9.4    | 55.8 ± 9.3              | 57.0 ± 9.3   | 55.6 ± 9.5   | 55.9 ± 9.4  | <0.001 |
| <b>Sex (men, %)</b>                       | 14468 (52.6)  | 1006 (15.0)             | 7977 (53.7)  | 4973 (92.5)  | 512 (97.2)  |        |
| <b>BMI (kg/m<sup>2</sup>)</b>             | 23.9 ± 3.4    | 23.0 ± 3.2              | 23.9 ± 3.4   | 24.9 ± 3.2   | 25.4 ± 3.0  | <0.001 |
| <b>SBP (mmHg)</b>                         | 130.12 ± 22.4 | 127.4 ± 22.1            | 130.3 ± 22.7 | 132.6 ± 21.8 | 135.9 ± 2.1 | <0.001 |
| <b>DBP (mmHg)</b>                         | 78.9 ± 13.8   | 76.56 ± 13.3            | 78.9 ± 13.8  | 81.4 ± 13.8  | 84.4 ± 13.7 | <0.001 |
| <b>Alcohol</b>                            |               |                         |              |              |             | <0.001 |
| Non-drinker (%)                           | 16034 (58.3)  | 5208 (77.4)             | 8727 (58.7)  | 1928 (35.8)  | 171 (32.4)  |        |
| Non-binge drinker (%)                     | 4492 (16.3)   | 792 (11.8)              | 2525 (17.0)  | 1072 (23.9)  | 103 (19.5)  |        |
| Binge drinker (%)                         | 6073 (22.1)   | 588 (8.7)               | 3111 (20.9)  | 2146 (39.9)  | 228 (43.3)  |        |
| Unknown (%)                               | 891 (3.2)     | 140 (2.1)               | 492 (3.3)    | 234 (4.4)    | 25 (4.7)    |        |
| <b>Smoking</b>                            |               |                         |              |              |             | <0.001 |
| Never smoker (%)                          | 15051 (54.8)  | 5564 (82.7)             | 8073 (54.3)  | 1307 (24.3)  | 107 (20.3)  |        |
| Ex-smoker (%)                             | 5689 (20.7)   | 521 (7.7)               | 3014 (20.3)  | 1947 (36.2)  | 207 (39.3)  |        |
| Current smoker (%)                        | 6749 (24.6)   | 643 (9.6)               | 3768 (25.4)  | 2125 (39.5)  | 213 (40.4)  |        |
| <b>Exercise</b>                           |               |                         |              |              |             | <0.001 |
| <b>No (%)</b>                             | 16797 (61.1)  | 4250 (63.2)             | 8963 (60.3)  | 3275 (60.9)  | 309 (58.6)  |        |
| <b>Yes (%)</b>                            | 10692 (38.9)  | 2478 (36.8)             | 5892 (38.7)  | 2104 (39.1)  | 218 (41.4)  |        |
| <b>Drugs</b>                              |               |                         |              |              |             |        |
| <sup>a</sup> Uric acid lowering agent (%) | 1399 (5.1)    | 281 (4.2)               | 768 (5.2)    | 310 (5.8)    | 40 (7.6)    | <0.001 |
| <sup>b</sup> Anti-uricosuric agent (%)    | 2168 (7.9)    | 430 (6.4)               | 1190 (8.0)   | 491 (9.1)    | 57 (10.8)   | <0.001 |
| <sup>c</sup> Uricosuric agent (%)         | 1877 (6.8)    | 396 (5.9)               | 1046 (7.0)   | 391 (7.3)    | 44 (8.3)    | 0.003  |
| <b>Measurement</b>                        |               |                         |              |              |             |        |
| Uric acid (mg/dL)                         | 5.03 ± 1.3    | 3.4 ± 0.5               | 5.0 ± 0.6    | 6.7 ± 0.5    | 8.8 ± 0.7   | <0.001 |
| BUN (mg/dL)                               | 14.0 ± 3.9    | 13.0 ± 3.7              | 14.1 ± 4.0   | 14.8 ± 3.7   | 15.1 ± 3.8  | <0.001 |

|                                   |               |              |              |               |               |        |
|-----------------------------------|---------------|--------------|--------------|---------------|---------------|--------|
| Creatinine (mg/dL)                | 0.9 ± 0.2     | 0.8 ± 0.1    | 0.9 ± 0.1    | 1.0 ± 0.1     | 1.1 ± 0.1     | <0.001 |
| eGFR (mL/min/1.73m <sup>2</sup> ) | 80.9 ± 11.4   | 82.5 ± 10.6  | 80.9 ± 11.4  | 79.4 ± 11.8   | 76.2 ± 12.2   | <0.001 |
| Albumin (g/dL)                    | 4.3 ± 0.3     | 4.3 ± 0.2    | 4.3 ± 0.2    | 4.4 ± 0.2     | 4.4 ± 0.3     | <0.001 |
| Hemoglobin (g/dL)                 | 14.3 ± 1.5    | 13.3 ± 1.4   | 14.4 ± 1.4   | 15.3 ± 1.1    | 15.5 ± 1.1    | <0.001 |
| AST (IU/L)                        | 25.6 ± 17.7   | 22.8 ± 14.4  | 25.4 ± 17.9  | 28.6 ± 17.6   | 34.0 ± 34.5   | <0.001 |
| ALT (IU/L)                        | 27.4 ± 25.0   | 21.0 ± 17.8  | 27.1 ± 25.8  | 35.0 ± 30.1   | 42.7 ± 43.0   | <0.001 |
| Bilirubin (mg/dL)                 | 1.0 ± 0.4     | 0.9 ± 0.4    | 1.0 ± 0.4    | 1.1 ± 0.4     | 1.1 ± 0.4     | <0.001 |
| GGT (IU/L)                        | 37.8 ± 52.6   | 24.9 ± 45.3  | 35.7 ± 49.3  | 55.8 ± 58.8   | 78.2 ± 85.1   | <0.001 |
| Glucose (mg/dL)                   | 99.1 ± 23.4   | 98.6 ± 28.2  | 99.3 ± 22.9  | 99.3 ± 17.7   | 101.2 ± 19.0  | 0.018  |
| HbA1c (%)                         | 5.6 ± 0.8     | 5.6 ± 1.0    | 5.6 ± 0.8    | 5.6 ± 0.7     | 5.7 ± 0.7     | 0.138  |
| Total cholesterol (mg/dL)         | 202.2 ± 35.9  | 197.2 ± 35.0 | 202.9 ± 36.0 | 205.6 ± 36.0  | 210.2 ± 37.5  | <0.001 |
| HDL cholesterol (mg/dL)           | 51.9 ± 13.1   | 56.1 ± 13.8  | 51.7 ± 12.8  | 47.7 ± 11.6   | 47.2 ± 12.0   | <0.001 |
| LDL cholesterol (mg/dL)           | 122.2 ± 35.0  | 118.4 ± 33.3 | 123.4 ± 35.1 | 123.9 ± 36.1  | 119.5 ± 41.5  | <0.001 |
| TG (mg/dL)                        | 135.9 ± 93.01 | 108.5 ± 66.0 | 134.3 ± 85.7 | 166.7 ± 116.1 | 215.0 ± 161.5 | <0.001 |
| CRP (mg/dL)                       | 0.2 ± 0.7     | 0.2 ± 0.7    | 0.2 ± 0.6    | 0.2 ± 0.8     | 0.3 ± 0.9     | 0.001  |
| <b>Comorbidities</b>              |               |              |              |               |               |        |
| DM (%)                            | 2577 (9.4)    | 610 (9.1)    | 1453 (9.9)   | 468 (8.8)     | 46 (8.8)      | <0.001 |
| HTN (%)                           | 10415 (38.1)  | 2092 (31.2)  | 5664 (38.3)  | 2374 (44.3)   | 285 (54.1)    | <0.001 |
| Gout (%)                          | 138 (0.5)     | 1 (0.0)      | 20 (0.1)     | 69 (1.3)      | 48 (9.1)      | <0.001 |

*Note:* Values for categorical variables are presented as percentages; for continuous variables as mean ± standard deviation. Conversion for units: cholesterol in mg/dL to mmol/L, x0.02586; glucose in mg/dL to mmol/L, x0.05551; triglycerides in mg/dL to mmol/L, x0.01129.

*Abbreviations:* BMI, body mass index; SBP, systolic blood pressure; DBP, diastolic blood pressure; GFR, glomerular filtration rate; ALP, alkaline phosphatase; AST, aspartate transaminase; ALT, alanine transaminase; HDL, high density lipoprotein; LDL, low density lipoprotein; TG, triglyceride; CRP, C-reactive protein; DM, diabetes mellitus; HTN, hypertension

<sup>a</sup>Uric acid lowering agent included allopurinol, benzbromarone and febuxostat; <sup>b</sup>uricosuric agent included losartan, calcium channel blocker and sevelamer; <sup>c</sup>anti-uricosuric agent included angiotensin converting enzyme inhibitor, angiotensin receptor blocker (except losartan) and aspirin.

**Supplementary Figure 1.** Distribution of SUA according to sex.

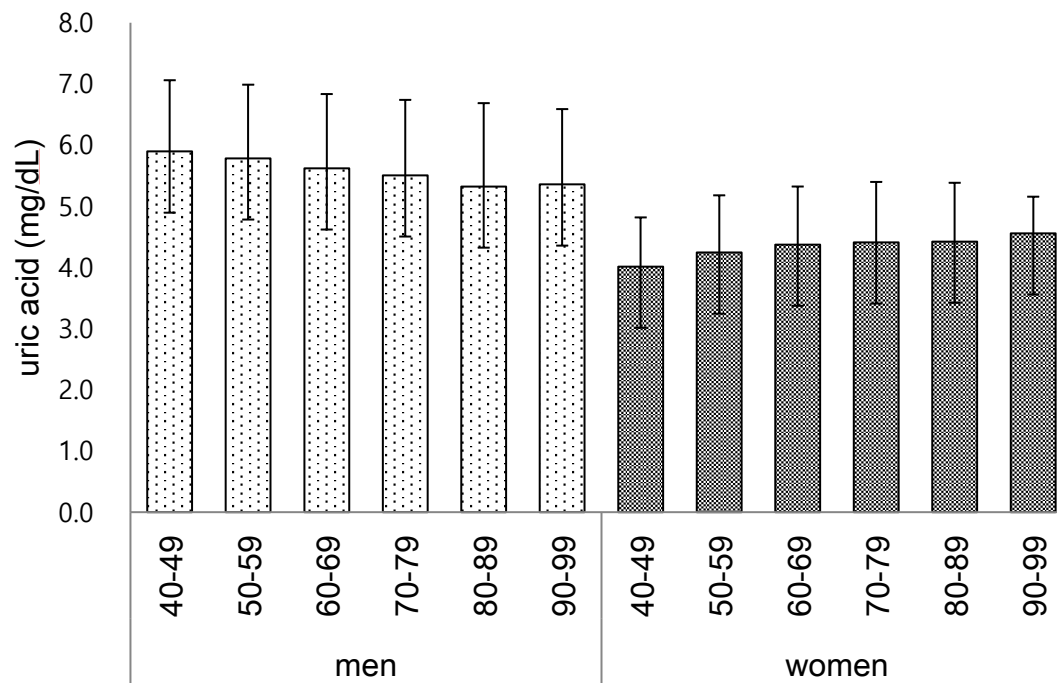

**Supplementary Table 3.** Baseline characteristics according to 4 groups of serum uric acid level in men.

|                                           | Men          | Serum uric acid (mg/dL) |              |              |              | P      |
|-------------------------------------------|--------------|-------------------------|--------------|--------------|--------------|--------|
|                                           |              | ≤ 4.0                   | 4.1 ~ 6.0    | 6.1~8.0      | > 8.0        |        |
| <b>N (%)</b>                              | 14468 (52.6) | 1006 (7.0)              | 7977 (55.1)  | 4973 (34.4)  | 512 (3.5)    |        |
| <b>Age (years)</b>                        | 56.3 ± 9.6   | 59.3 ± 10.0             | 56.6 ± 9.6   | 55.3 ± 9.5   | 55.8 ± 9.4   | <0.001 |
| <b>BMI (kg/m<sup>2</sup>)</b>             | 24.1 ± 3.2   | 23.2 ± 3.2              | 23.7 ± 3.2   | 24.8 ± 3.1   | 25.3 ± 3.0   | <0.001 |
| <b>SBP (mmHg)</b>                         | 130.8 ± 21.6 | 130.2 ± 21.9            | 129.6 ± 21.6 | 132.3 ± 21.6 | 135.7 ± 21.0 | <0.001 |
| <b>DBP (mmHg)</b>                         | 80.2 ± 13.8  | 79.3 ± 13.7             | 79.29 ± 13.7 | 81.5 ± 13.7  | 84.3 ± 13.7  | <0.001 |
| <b>Alcohol</b>                            |              |                         |              |              |              | <0.001 |
| Non-drinker (%)                           | 5114 (35.3)  | 414 (41.2)              | 2946 (36.9)  | 1594 (32.1)  | 160 (31.3)   |        |
| Non-binge drinker (%)                     | 3229 (22.3)  | 232 (23.1)              | 1680 (23.3)  | 1036 (20.8)  | 101 (19.7)   |        |
| Binge drinker (%)                         | 5479 (37.9)  | 318 (31.6)              | 2820 (35.4)  | 2114 (42.5)  | 227 (44.3)   |        |
| Unknown (%)                               | 646 (4.5)    | 42 (4.2)                | 351 (4.4)    | 229 (4.6)    | 24 (4.7)     |        |
| <b>Smoking</b>                            |              |                         |              |              |              | 0.713  |
| Never smoker (%)                          | 2884 (19.9)  | 213 (21.2)              | 1632 (20.5)  | 946 (19.0)   | 93 (18.2)    |        |
| Ex-smoker (%)                             | 5372 (37.1)  | 368 (36.6)              | 2865 (35.9)  | 1932 (38.8)  | 207 (40.4)   |        |
| Current smoker (%)                        | 6212 (42.9)  | 425 (42.2)              | 3480 (43.6)  | 2095 (42.1)  | 212 (41.4)   |        |
| <b>Exercise</b>                           |              |                         |              |              |              | 0.485  |
| No (%)                                    | 8514 (58.8)  | 606 (60.2)              | 3644 (63.7)  | 2990 (60.1)  | 298 (58.2)   |        |
| Yes (%)                                   | 5954 (41.2)  | 400 (39.8)              | 2078 (36.3)  | 1983 (39.9)  | 214 (41.8)   |        |
| <b>Drugs</b>                              |              |                         |              |              |              |        |
| <sup>a</sup> Uric acid lowering agent (%) | 872 (6.0)    | 64 (6.4)                | 473 (5.9)    | 295 (5.9)    | 40 (7.8)     | 0.431  |
| <sup>b</sup> Anti-uricosuric agent (%)    | 1349 (9.3)   | 96 (9.5)                | 736 (9.2)    | 461 (9.3)    | 56 (10.9)    | 0.628  |
| <sup>c</sup> Uricosuric agent (%)         | 1108 (7.7)   | 70 (7.0)                | 626 (7.8)    | 368 (7.4)    | 44 (8.6)     | 0.531  |
| <b>Measurement</b>                        |              |                         |              |              |              |        |
| Uric acid (mg/dL)                         | 5.7 ± 1.2    | 3.4 ± 0.5               | 4.8 ± 0.5    | 6.8 ± 0.5    | 8.7 ± 0.7    | <0.001 |
| BUN (mg/dL)                               | 14.6 ± 3.8   | 12.7 ± 3.6              | 13.6 ± 4.1   | 14.8 ± 0.7   | 15.1 ± 3.7   | <0.001 |
| Creatinine (mg/dL)                        | 1.0 ± 0.1    | 0.8 ± 0.8               | 0.8 ± 0.1    | 1.1 ± 0.1    | 1.1 ± 0.1    | <0.001 |

|                                   |               |              |              |               |               |        |
|-----------------------------------|---------------|--------------|--------------|---------------|---------------|--------|
| eGFR (mL/min/1.73m <sup>2</sup> ) | 82.3 ± 12.1   | 81.8 ± 9.8   | 77.7 ± 10.1  | 79.9 ± 11.7   | 76.4 ± 12.3   | <0.001 |
| Albumin (g/dL)                    | 4.4 ± 0.3     | 4.3 ± 0.2    | 4.3 ± 0.2    | 4.4 ± 0.2     | 4.4 ± 0.3     | <0.001 |
| Hemoglobin (g/dL)                 | 15.3 ± 1.1    | 13.0 ± 1.2   | 13.3 ± 1.0   | 15.5 ± 1.0    | 15.5 ± 1.1    | <0.001 |
| AST (IU/L)                        | 27.6 ± 21.3   | 11.0 ± 0.1   | 24.1 ± 12.6  | 28.0 ± 17.5   | 34.1 ± 34.9   | <0.001 |
| ALT (IU/L)                        | 32.4 ± 30.9   | 19.5 ± 15.1  | 23.4 ± 18.4  | 35.4 ± 30.3   | 43.1 ± 43.5   | <0.001 |
| Bilirubin (mg/dL)                 | 1.1 ± 0.4     | 0.8 ± 0.3    | 0.9 ± 0.3    | 1.1 ± 0.4     | 1.1 ± 0.4     | <0.001 |
| GGT (IU/L)                        | 51.3 ± 66.7   | 51.5 ± 102.9 | 45.5 ± 62.3  | 57.6 ± 60.2   | 79.4 ± 86.0   | <0.001 |
| Glucose (mg/dL)                   | 101.7 ± 25.8  | 95.7 ± 22.8  | 96.3 ± 17.3  | 99.1 ± 17.7   | 100.6 ± 18.0  | <0.001 |
| HbA1c (%)                         | 5.7 ± 0.9     | 5.5 ± 0.8    | 5.6 ± 0.6    | 5.6 ± 0.7     | 5.7 ± 0.6     | <0.001 |
| Total cholesterol (mg/dL)         | 199.9 ± 34.7  | 197.8 ± 34.9 | 209.4 ± 37.5 | 204.2 ± 35.2  | 209.7 ± 37.3  | <0.001 |
| HDL cholesterol (mg/dL)           | 48.7 ± 12.1   | 57.1 ± 13.6  | 54.4 ± 13.1  | 47.5 ± 11.6   | 47.0 ± 11.9   | <0.001 |
| LDL cholesterol (mg/dL)           | 120.2 ± 34.4  | 116.0 ± 33.4 | 128.3 ± 36.4 | 122.7 ± 35.3  | 118.8 ± 41.3  | <0.001 |
| TG (mg/dL)                        | 151.6 ± 105.8 | 103.6 ± 58.0 | 128.2 ± 79.2 | 167.5 ± 117.8 | 216.2 ± 163.2 | <0.001 |
| CRP (mg/dL)                       | 0.2 ± 0.77    | 0.2 ± 0.5    | 0.2 ± 0.53   | 0.2 ± 0.8     | 0.3 ± 0.9     | 0.001  |
| <b>Comorbidities</b>              |               |              |              |               |               |        |
| DM (%)                            | 1720 (12.0)   | 251 (25.0)   | 1014 (12.8)  | 413 (8.4)     | 42 (8.3)      | <0.001 |
| HTN (%)                           | 5723 (39.7)   | 380 (38.0)   | 2911 (36.7)  | 2158 (43.6)   | 274 (53.5)    | <0.001 |
| Gout (%)                          | 133 (0.9)     | 0 (0)        | 18 (0.2)     | 68 (1.4)      | 47 (9.2)      | <0.001 |

*Note:* Values for categorical variables are presented as percentages; for continuous variables as mean ± standard deviation. Conversion for units: cholesterol in mg/dL to mmol/L, x0.02586; glucose in mg/dL to mmol/L, x0.05551; triglycerides in mg/dL to mmol/L, x0.01129.

*Abbreviations:* BMI, body mass index; SBP, systolic blood pressure; DBP, diastolic blood pressure; GFR, glomerular filtration rate; ALP, alkaline phosphatase; AST, aspartate transaminase; ALT, alanine transaminase; HDL, high density lipoprotein; LDL, low density lipoprotein; TG, triglyceride; CRP, C-reactive protein; DM, diabetes mellitus; HTN, hypertension

<sup>a</sup>Uric acid lowering agent included allopurinol, benzbromarone and febuxostat; <sup>b</sup>uricosuric agent included losartan, calcium channel blocker and sevelamer; <sup>c</sup>anti-uricosuric agent included angiotensin converting enzyme inhibitor, angiotensin receptor blocker (except losartan) and aspirin.

**Supplementary Table 4.** Baseline characteristics according to 4 groups of serum uric acid level in women.

|                                           | Women        | Serum uric acid (mg/dL) |              |               |              | P      |
|-------------------------------------------|--------------|-------------------------|--------------|---------------|--------------|--------|
|                                           |              | ≤ 4.0                   | 4.1 ~ 6.0    | 6.1~8.0       | > 8.0        |        |
| <b>N (%)</b>                              | 13021 (47.4) | 5722 (43.9)             | 6878(52.8)   | 406 (3.1)     | 15 (0.1)     |        |
| <b>Age (years)</b>                        | 56.6 ± 9.1   | 55.2 ± 9.0              | 57.4 ± 9.0   | 59.87 ± 8.36  | 58.6 ± 8.3   | <0.001 |
| <b>BMI (kg/m<sup>2</sup>)</b>             | 23.7 ± 3.5   | 23.0 ± 3.2              | 24.1 ± 3.6   | 26.1 ± 3.7    | 26.6 ± 3.2   | <0.001 |
| <b>SBP (mmHg)</b>                         | 129.5 ± 23.2 | 126.9 ± 22.1            | 131.1 ± 23.8 | 136.12 ± 24.8 | 140.7 ± 22.1 | <0.001 |
| <b>DBP (mmHg)</b>                         | 77.5 ± 13.7  | 76.1 ± 13.2             | 78.4 ± 13.9  | 80.54 ± 13.4  | 88.1 ± 14.5  | <0.001 |
| <b>Alcohol</b>                            |              |                         |              |               |              | 0.041  |
| Non-drinker (%)                           | 10920 (83.9) | 4794 (83.8)             | 5781 (84.1)  | 334 (82.0)    | 11 (73.3)    |        |
| Non-binge drinker (%)                     | 1263 (9.7)   | 560 (9.8)               | 665 (9.7)    | 36 (8.9)      | 2 (13.3)     |        |
| Binge drinker (%)                         | 594 (4.6)    | 270 (4.7)               | 291 (4.2)    | 32 (7.9)      | 1 (6.7)      |        |
| Unknown (%)                               | 245 (1.9)    | 98 (1.7)                | 141 (2.1)    | 5 (1.2)       | 1 (6.7)      |        |
| <b>Smoking</b>                            |              |                         |              |               |              | 0.260  |
| Never smoker (%)                          | 12167 (93.4) | 5351 (93.5)             | 6441 (93.6)  | 361 (88.9)    | 14 (93.3)    |        |
| Ex-smoker (%)                             | 317 (2.4)    | 153 (2.7)               | 149 (2.2)    | 14 (3.7)      | 0 (0.0)      |        |
| Current smoker (%)                        | 537 (4.1)    | 218 (3.8)               | 288 (4.2)    | 30 (7.4)      | 1 (6.7)      |        |
| <b>Exercise</b>                           |              |                         |              |               |              | 0.650  |
| No (%)                                    | 8283 (63.6)  | 3644 (63.7)             | 4343 (63.1)  | 285 (70.2)    | 11 (73.3)    |        |
| Yes (%)                                   | 4738 (36.4)  | 2078 (36.3)             | 2535 (36.9)  | 121 (29.8)    | 4 (26.7)     |        |
| <b>Drugs</b>                              |              |                         |              |               |              |        |
| <sup>a</sup> Uric acid lowering agent (%) | 527 (4.0)    | 217 (3.8)               | 295 (4.3)    | 15 (3.7)      | 0 (0)        | 0.431  |
| <sup>b</sup> Anti-uricosuric agent (%)    | 819 (6.3)    | 334 (5.8)               | 454 (6.6)    | 30 (7.4)      | 1 (6.7)      | 0.267  |
| <sup>c</sup> Uricosuric agent (%)         | 769 (5.9)    | 326 (5.7)               | 420 (6.1)    | 23 (5.7)      | 0 (0)        | 0.587  |
| <b>Measurement</b>                        |              |                         |              |               |              |        |
| Uric acid (mg/dL)                         | 4.2 ± 0.9    | 3.5 ± 0.5               | 5.2 ± 0.5    | 6.6 ± 0.5     | 9.0 ± 1.2    | <0.001 |
| BUN (mg/dL)                               | 13.2 ± 3.9   | 14.6 ± 4.1              | 14.5 ± 3.8   | 14.8 ± 4.0    | 16.1 ± 5.4   | <0.001 |
| Creatinine (mg/dL)                        | 0.8 ± 0.9    | 1.0 ± 0.1               | 1.0 ± 0.1    | 0.9 ± 0.1     | 0.9 ± 0.1    | <0.001 |

|                                   |              |              |              |              |              |        |
|-----------------------------------|--------------|--------------|--------------|--------------|--------------|--------|
| eGFR (mL/min/1.73m <sup>2</sup> ) | 79.3 ± 10.3  | 86.8 ± 13.3  | 83.6 ± 11.8  | 72.8 ± 10.6  | 68.3 ± 8.8   | <0.001 |
| Albumin (g/dL)                    | 4.3 ± 0.24   | 4.3 ± 0.3    | 4.3 ± 0.2    | 4.3 ± 0.3    | 4.4 ± 0.3    | <0.001 |
| Hemoglobin (g/dL)                 | 13.2 ± 1.1   | 15.1 ± 1.3   | 15.3 ± 1.0   | 13.6 ± 0.9   | 14.6 ± 0.9   | <0.001 |
| AST (IU/L)                        | 23.3 ± 12.3  | 27.2 ± 26.2  | 26.5 ± 21.4  | 28.4 ± 19.1  | 30.3 ± 10.5  | <0.001 |
| ALT (IU/L)                        | 21.9 ± 17.6  | 19.5 ± 15.1  | 23.4 ± 18.4  | 30.1 ± 27.4  | 31.1 ± 15.9  | <0.001 |
| Bilirubin (mg/dL)                 | 0.9 ± 0.3    | 0.8 ± 0.4    | 0.9 ± 0.3    | 0.9 ± 0.3    | 0.8 ± 0.2    | 0.006  |
| GGT (IU/L)                        | 22.9 ± 21.9  | 20.3 ± 20.2  | 45.5 ± 62.3  | 57.6 ± 60.2  | 79.4 ± 86.0  | <0.001 |
| Glucose (mg/dL)                   | 96.2 ± 20.0  | 95.7 ± 22.8  | 96.4 ± 17.3  | 101.1 ± 17.2 | 123.4 ± 35.7 | <0.001 |
| HbA1c (%)                         | 5.6 ± 0.7    | 5.5 ± 0.8    | 5.6 ± 0.6    | 5.9 ± 0.7    | 6.5 ± 1.0    | <0.001 |
| Total cholesterol (mg/dL)         | 204.7 ± 37.1 | 197.8 ± 34.9 | 209.4 ± 37.5 | 222.0 ± 1.4  | 228.5 ± 40.4 | <0.001 |
| HDL cholesterol (mg/dL)           | 55.5 ± 13.4  | 57.1 ± 13.6  | 54.4 ± 13.1  | 50.9 ± 11.7  | 50.6 ± 13.2  | <0.001 |
| LDL cholesterol (mg/dL)           | 124.5 ± 35.7 | 118.9 ± 33.3 | 128.3 ± 36.4 | 138.2 ± 41.9 | 142.9 ± 44.2 | <0.001 |
| TG (mg/dL)                        | 118.4 ± 72.6 | 103.6 ± 58.0 | 128.2 ± 79.2 | 157.4 ± 92.9 | 175.6 ± 76.9 | <0.001 |
| CRP (mg/dL)                       | 0.2 ± 0.5    | 0.2 ± 0.5    | 0.2 ± 0.5    | 0.2 ± 0.3    | 0.2 ± 0.1    | 0.142  |
| <b>Comorbidities</b>              |              |              |              |              |              |        |
| DM (%)                            | 857 (6.6)    | 359 (6.3)    | 439 (6.4)    | 55 (13.7)    | 4 (26.7)     | 0.034  |
| HTN (%)                           | 4692 (11.8)  | 2753 (40.3)  | 1712 (30.0)  | 216 (53.5)   | 11 (73.3)    | <0.001 |
| Gout (%)                          | 5 (0.0)      | 1 (0.0)      | 2 (0.0)      | 1 (0.2)      | 1 (6.7)      | <0.001 |

*Note:* Values for categorical variables are presented as percentages; for continuous variables as mean ± standard deviation. Conversion for units: cholesterol in mg/dL to mmol/L, x0.02586; glucose in mg/dL to mmol/L, x0.05551; triglycerides in mg/dL to mmol/L, x0.01129.

*Abbreviations:* BMI, body mass index; SBP, systolic blood pressure; DBP, diastolic blood pressure; GFR, glomerular filtration rate; ALP, alkaline phosphatase; AST, aspartate transaminase; ALT, alanine transaminase; HDL, high density lipoprotein; LDL, low density lipoprotein; TG, triglyceride; CRP, C-reactive protein; DM, diabetes mellitus; HTN, hypertension

<sup>a</sup>Uric acid lowering agent included allopurinol, benzbromarone and febuxostat; <sup>b</sup>uricosuric agent included losartan, calcium channel blocker and sevelamer; <sup>c</sup>anti-uricosuric agent included angiotensin converting enzyme inhibitor, angiotensin receptor blocker (except losartan) and aspirin.



**Supplementary Figure 2.** Nonlinear association between serum uric acid and mortality in women.

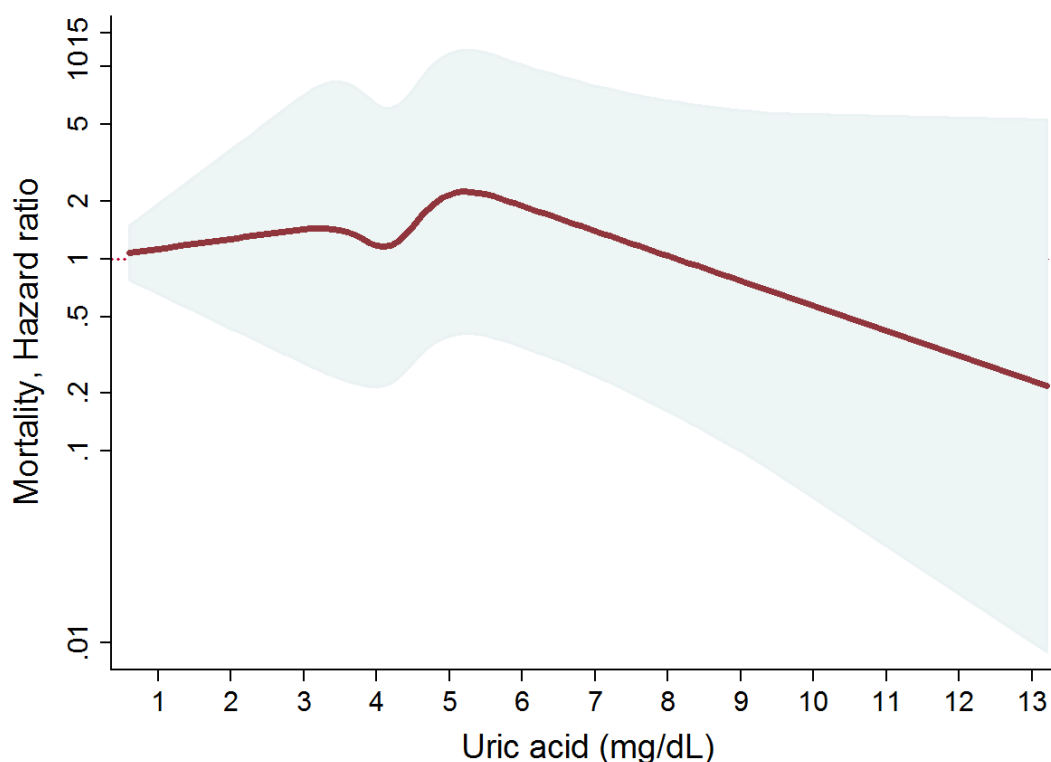

**Supplementary Table 5.** Cause of death in all participants and according to sex.

| Serum uric acid (mg/dL) | Death (%)  | Causes of death |            |            | P     |
|-------------------------|------------|-----------------|------------|------------|-------|
|                         |            | Malignancy (%)  | CVD (%)    | Others (%) |       |
| <b>All participants</b> | 1402 (5.1) | 692 (49.4)      | 189 (13.5) | 521 (37.2) | 0.361 |
| ≤ 4.0                   | 300 (4.5)  | 142 (47.3)      | 36 (19.0)  | 122 (40.7) |       |
| 4.1 ~ 6.0               | 781 (5.3)  | 388 (49.7)      | 114 (14.6) | 279 (35.7) |       |
| 6.1 ~ 8.0               | 283 (5.3)  | 146 (51.6)      | 32 (11.3)  | 105 (7.1)  |       |
| > 8.0                   | 38 (7.2)   | 16 (42.1)       | 7 (18.4)   | 15 (39.5)  |       |
| <b>All men</b>          | 999 (6.9)  | 513 (51.4)      | 127 (12.7) | 359 (35.9) | 0.394 |
| ≤ 4.0                   | 147 (14.7) | 71 (48.3)       | 20 (13.6)  | 56 (38.1)  |       |
| 4.1 ~ 6.0               | 543 (54.4) | 287 (52.9)      | 68 (12.5)  | 188 (34.6) |       |
| 6.1 ~ 8.0               | 272 (27.2) | 140 (51.5)      | 32 (11.8)  | 100 (6.8)  |       |
| > 8.0                   | 37 (3.7)   | 15 (40.5)       | 7 (18.9)   | 15 (40.5)  |       |
| <b>All women</b>        | 403 (3.1)  | 179 (44.4)      | 62 (15.4)  | 162 (40.2) | 0.734 |
| ≤ 4.0                   | 153 (38.0) | 71 (46.4)       | 16 (10.5)  | 66 (43.1)  |       |
| 4.1 ~ 6.0               | 238 (59.1) | 101 (42.4)      | 46 (19.3)  | 91 (38.2)  |       |
| 6.1 ~ 8.0               | 11 (2.7)   | 6 (54.5)        | 0 (0.0)    | 5 (45.5)   |       |
| > 8.0                   | 1 (0.2)    | 1 (100.0)       | 0 (0.0)    | 0 (0.0)    |       |

Abbreviation: CVD, cardiovascular disease

**Supplementary Table 6.** Univariate and multivariate Cox analysis in men according to death cause.

|                                 | SUA     | Univariate          |        | Multivariate <sup>a</sup> |       |
|---------------------------------|---------|---------------------|--------|---------------------------|-------|
|                                 |         | HR (95% CI)         | P      | HR (95% CI)               | P     |
| <b>Cardiovascular mortality</b> | ≤4.0    | 2.339 (1.421-3.851) | 0.001  | 1.661 (0.991-2.782)       | 0.054 |
|                                 | 4.1-6.0 | reference           |        | reference                 |       |
|                                 | 6.1-8.0 | 0.763 (0.501-1.162) | 0.208  | 0.840 (0.542-1.301)       | 0.434 |
|                                 | >8.0    | 1.679 (0.771-3.656) | 0.192  | 1.764 (0.796-3.909)       | 0.162 |
| <b>malignancy</b>               | ≤4.0    | 1.971 (1.520-2.556) | <0.001 | 1.301 (0.993-1.705)       | 0.056 |
|                                 | 4.1-6.0 | reference           |        | reference                 |       |
|                                 | 6.1-8.0 | 0.791 (0.646-0.968) | 0.023  | 1.002 (0.812-1.237)       | 0.984 |
|                                 | >8.0    | 0.848 (0.505-1.425) | 0.534  | 1.026 (0.605-1.739)       | 0.925 |

Abbreviations: SUA, serum uric acid; HR, hazard ratio; CI, confidential interval

<sup>a</sup>In multivariate analysis, we adjusted for age, body mass index, diabetes mellitus, hypertension, creatinine, albumin, hemoglobin, C-reactive protein, glucose, mean arterial pressure, high density lipoprotein, low density lipoprotein, triglycerides, smoking, alcohol consumption, and exercise.
